# Supplementary material
Source: PubMed Central journal article supplement (PMC3844061)
Supplement: NIHMS496458-supplement-Supp_Table_S1-S2.pdf [file NIHMS496458-supplement-Supp_Table_S1-S2.pdf]

Appendix Table 1a. Coefficient estimates from models of episodes of mental health care among those with probable mental illness in initiation and follow-up phase

|                                                 | Initiation of<br>Mental Health<br>Care |        | Adequate Mental<br>Health Care |        | Episode with<br>only RX Events |        |
|-------------------------------------------------|----------------------------------------|--------|--------------------------------|--------|--------------------------------|--------|
|                                                 | Coef.                                  | SE     | Coef.                          | SE     | Coef.                          | SE     |
| <b>Race/Ethnicity</b>                           |                                        |        |                                |        |                                |        |
| Black                                           | -0.72 ***                              | [0.10] | -0.65 ***                      | [0.14] | -0.38 **                       | [0.13] |
| Latino                                          | -0.46 ***                              | [0.10] | -0.41 **                       | [0.15] | -0.55 ***                      | [0.13] |
| <b>Need-Related Variables - Mental Health</b>   |                                        |        |                                |        |                                |        |
| Severe psychological distress (K-6)             | -0.01                                  | [0.04] | 0.06 ***                       | [0.01] | -0.01                          | [0.01] |
| Probable depressive disorder (PHQ-2)            | 0.01                                   | [0.01] | 0.01                           | [0.05] | -0.04                          | [0.04] |
| Mental health component SF-12                   | -0.02 **                               | [0.01] | 0.00                           | [0.01] | 0.00                           | [0.01] |
| <i>Self-rated mental health</i>                 |                                        |        |                                |        |                                |        |
| Very Good                                       | 0.26                                   | [0.17] | 0.20                           | [0.31] | -0.15                          | [0.26] |
| Good                                            | 0.34 *                                 | [0.15] | 0.90 **                        | [0.28] | -0.45                          | [0.25] |
| Fair                                            | 0.79 ***                               | [0.16] | 1.55 ***                       | [0.28] | -0.78 **                       | [0.25] |
| Poor                                            | 0.71 ***                               | [0.20] | 1.97 ***                       | [0.30] | -1.30 ***                      | [0.29] |
| <b>Need-Related Variables - Physical Health</b> |                                        |        |                                |        |                                |        |
| 1 physical health comorbidity                   | 0.03                                   | [0.12] | 0.14                           | [0.16] | 0.02                           | [0.14] |
| 2+ physical health comorbidities                | 0.37 **                                | [0.12] | 0.17                           | [0.16] | 0.19                           | [0.15] |
| Physical health component SF-12                 | 0.00                                   | [0.00] | 0.01                           | [0.01] | -0.01                          | [0.01] |
| Any work limitation                             | 0.04                                   | [0.10] | 0.57 ***                       | [0.14] | -0.20                          | [0.13] |
| <b>Other Need-Related Variables</b>             |                                        |        |                                |        |                                |        |
| Female                                          | 0.40 ***                               | [0.08] | 0.10                           | [0.11] | 0.14                           | [0.12] |
| <i>Age</i>                                      |                                        |        |                                |        |                                |        |
| 18-24                                           | -0.20                                  | [0.17] | -0.09                          | [0.27] | -0.33                          | [0.24] |
| 25-34                                           | -0.01                                  | [0.14] | 0.05                           | [0.19] | -0.25                          | [0.19] |
| 45-54                                           | 0.08                                   | [0.12] | 0.03                           | [0.16] | 0.19                           | [0.15] |
| 55-64                                           | -0.02                                  | [0.14] | -0.60 **                       | [0.18] | 0.67 ***                       | [0.16] |
| 65-74                                           | -0.26                                  | [0.18] | -1.55 ***                      | [0.25] | 1.11 ***                       | [0.22] |
| 75+                                             | -0.33                                  | [0.18] | -1.79 ***                      | [0.36] | 1.17 ***                       | [0.24] |
| Married                                         | -0.04                                  | [0.08] | -0.38 **                       | [0.12] | 0.32 **                        | [0.12] |
| Panel                                           | 0.03                                   | [0.03] | 0.03                           | [0.04] | -0.05                          | [0.04] |
| <b>Non-Need-Related Variables - SES</b>         |                                        |        |                                |        |                                |        |
| <i>% Federal Poverty Level</i>                  |                                        |        |                                |        |                                |        |
| 100-124%                                        | 0.04                                   | [0.16] | 0.14                           | [0.20] | 0.06                           | [0.19] |
| 125-199%                                        | 0.02                                   | [0.12] | -0.15                          | [0.17] | 0.05                           | [0.15] |
| 200-399%                                        | 0.07                                   | [0.12] | 0.16                           | [0.17] | 0.06                           | [0.14] |
| 400%+                                           | 0.30 *                                 | [0.13] | 0.45 *                         | [0.20] | -0.23                          | [0.17] |
| <i>Education</i>                                |                                        |        |                                |        |                                |        |
| HS grad                                         | 0.16                                   | [0.10] | 0.38 **                        | [0.13] | 0.04                           | [0.12] |
| Any college                                     | 0.32 **                                | [0.11] | 0.45 **                        | [0.15] | -0.04                          | [0.14] |
| College grad                                    | 0.10                                   | [0.13] | 1.14 ***                       | [0.19] | -0.59 **                       | [0.20] |
| <b>Other Non-Need Related Variables</b>         |                                        |        |                                |        |                                |        |
| <i>Insurance</i>                                |                                        |        |                                |        |                                |        |
| Any uninsured                                   | -0.34 **                               | [0.12] | -0.53 **                       | [0.19] | 0.08                           | [0.16] |
| Any public, never uninsured                     | -0.06                                  | [0.12] | 0.30                           | [0.16] | -0.23                          | [0.14] |
| HMO                                             | 0.04                                   | [0.09] | 0.04                           | [0.12] | -0.04                          | [0.11] |
| Employed                                        | -0.22 *                                | [0.10] | -0.76 ***                      | [0.14] | 0.30 *                         | [0.13] |
| <i>Region</i>                                   |                                        |        |                                |        |                                |        |
| Midwest                                         | -0.02                                  | [0.11] | -0.37 *                        | [0.16] | 0.30                           | [0.16] |
| South                                           | -0.04                                  | [0.11] | -0.42 **                       | [0.15] | 0.30 *                         | [0.13] |
| West                                            | -0.04                                  | [0.11] | -0.56 ***                      | [0.17] | 0.41 **                        | [0.16] |
| Urbanicity                                      | -0.03                                  | [0.10] | 0.18                           | [0.12] | -0.06                          | [0.12] |
| Constant                                        | -0.98                                  | [0.54] | -4.29 ***                      | [0.78] | 0.87                           | [0.76] |

Data: Panels 9-13 (2004-2009) Medical Expenditure Panel Survey, \*\*\* p<0.001, \*\* p<0.01, \* p<0.05

Appendix Table 1b. Coefficient estimates from models of episodes of mental health care among those with probable mental illness in follow-up and termination phases

|                                                 | 2 PM for # of Visits    |            |                                   |            | 2 PM for Length of Episode |            |                                     |             | ER/IP Event<br>within Episode |            | Proportion<br>Visits within<br>Episode |            | Proportion Visits<br>within Episode |            |       |            |
|-------------------------------------------------|-------------------------|------------|-----------------------------------|------------|----------------------------|------------|-------------------------------------|-------------|-------------------------------|------------|----------------------------------------|------------|-------------------------------------|------------|-------|------------|
|                                                 | Number of Visits<br>= 0 |            | Number of Visits,<br>if >0 Visits |            | Length of<br>Episode = 1   |            | Length of Episode,<br>if Length > 1 |             |                               |            | Episode<br>Expenditures                |            | Specialist                          |            | PCP   |            |
|                                                 | Coef.                   | SE         | Coef.                             | SE         | Coef.                      | SE         | Coef.                               | SE          | Coef.                         | SE         | Coef.                                  | SE         | Coef.                               | SE         |       |            |
| <b>Race/Ethnicity</b>                           |                         |            |                                   |            |                            |            |                                     |             |                               |            |                                        |            |                                     |            |       |            |
| Black                                           | -0.46                   | *** [0.14] | -4.17                             | ** [1.77]  | 0.30                       | * [0.15]   | -19.09                              | [17.88]     | -0.18                         | [0.14]     | 0.45                                   | [0.26]     | 0.06                                | ** [0.02]  | 0.01  | [0.02]     |
| Latino                                          | -0.54                   | *** [0.14] | -5.03                             | *** [1.64] | 0.13                       | [0.15]     | -26.13                              | [15.65]     | -0.02                         | [0.13]     | 0.04                                   | [0.29]     | 0.03                                | [0.02]     | 0.05  | ** [0.02]  |
| <b>Need-Related Variables - Mental Health</b>   |                         |            |                                   |            |                            |            |                                     |             |                               |            |                                        |            |                                     |            |       |            |
| Severe psychological distress (K-6)             | 0.01                    | [0.01]     | 0.47                              | ** [0.19]  | -0.01                      | [0.01]     | 0.88                                | [1.65]      | 0.00                          | [0.01]     | 0.02                                   | [0.03]     | 0.00                                | [0.00]     | 0.00  | [0.00]     |
| Probable depressive disorder (PHQ-2)            | -0.02                   | [0.04]     | 0.24                              | [0.65]     | 0.01                       | [0.05]     | 9.45                                | [5.43]      | 0.02                          | [0.04]     | -0.11                                  | [0.08]     | -0.01                               | [0.01]     | 0.00  | [0.00]     |
| Mental health component SF-12                   | 0.01                    | [0.01]     | 0.15                              | [0.11]     | 0.00                       | [0.01]     | 0.03                                | [0.92]      | -0.01                         | [0.01]     | 0.00                                   | [0.01]     | 0.00                                | [0.00]     | 0.00  | [0.00]     |
| <i>Self rated mental health</i>                 |                         |            |                                   |            |                            |            |                                     |             |                               |            |                                        |            |                                     |            |       |            |
| Very Good                                       | -0.28                   | [0.26]     | 2.26                              | [3.33]     | -0.52                      | [0.30]     | 34.51                               | [31.54]     | 0.54                          | * [0.23]   | -0.79                                  | [0.72]     | 0.02                                | [0.03]     | -0.02 | [0.03]     |
| Good                                            | -0.52                   | * [0.24]   | 2.53                              | * [3.29]   | -0.32                      | [0.29]     | 57.15                               | [30.78]     | 0.53                          | * [0.22]   | 0.06                                   | [0.57]     | 0.04                                | [0.03]     | -0.01 | [0.02]     |
| Fair                                            | -0.91                   | *** [0.24] | 6.40                              | ** [3.39]  | -0.62                      | * [0.30]   | 73.57                               | ** [28.73]  | 0.93                          | *** [0.22] | 0.32                                   | [0.56]     | 0.07                                | * [0.03]   | 0.00  | [0.03]     |
| Poor                                            | -1.37                   | *** [0.28] | 7.45                              | * [3.8]    | -1.05                      | ** [0.33]  | 86.03                               | ** [30.77]  | 1.29                          | *** [0.23] | 1.11                                   | [0.58]     | 0.12                                | *** [0.03] | 0.00  | [0.03]     |
| <b>Need-Related Variables - Physical Health</b> |                         |            |                                   |            |                            |            |                                     |             |                               |            |                                        |            |                                     |            |       |            |
| 1 physical health comorbidity                   | -0.07                   | [0.15]     | 3.14                              | [1.76]     | -0.29                      | [0.15]     | 13.80                               | [17.84]     | 0.31                          | * [0.14]   | 0.27                                   | [0.32]     | -0.02                               | [0.02]     | -0.01 | [0.02]     |
| 2+ physical health comorbidities                | 0.07                    | [0.15]     | 4.41                              | ** [1.86]  | -0.06                      | [0.16]     | 43.98                               | ** [16.96]  | 0.33                          | * [0.15]   | 0.35                                   | [0.32]     | -0.01                               | [0.02]     | -0.03 | [0.02]     |
| Physical health component SF-12                 | -0.01                   | [0.01]     | 0.13                              | [0.09]     | 0.00                       | [0.01]     | 0.40                                | [0.59]      | 0.00                          | [0.01]     | 0.01                                   | [0.01]     | 0.00                                | [0.00]     | 0.00  | [0.00]     |
| Any work limitation                             | -0.16                   | [0.13]     | 6.51                              | *** [2.11] | -0.07                      | [0.13]     | 66.63                               | *** [15.16] | 0.44                          | *** [0.12] | 0.41                                   | [0.24]     | 0.00                                | [0.02]     | -0.02 | [0.01]     |
| <b>Other Need-Related Variables</b>             |                         |            |                                   |            |                            |            |                                     |             |                               |            |                                        |            |                                     |            |       |            |
| Female                                          | 0.12                    | [0.12]     | 0.80                              | [1.47]     | -0.04                      | [0.12]     | 0.17                                | [12.66]     | 0.02                          | [0.10]     | -0.06                                  | [0.22]     | -0.02                               | [0.01]     | 0.00  | [0.01]     |
| <i>Age</i>                                      |                         |            |                                   |            |                            |            |                                     |             |                               |            |                                        |            |                                     |            |       |            |
| 18-24                                           | -0.31                   | [0.24]     | -3.98                             | [2.78]     | 0.15                       | [0.25]     | -74.32                              | * [32.05]   | -0.36                         | [0.25]     | 0.29                                   | [0.44]     | 0.04                                | [0.03]     | 0.00  | [0.03]     |
| 25-34                                           | -0.13                   | [0.19]     | -0.70                             | [2.05]     | -0.12                      | [0.19]     | -40.22                              | [24.58]     | -0.04                         | [0.18]     | 0.11                                   | [0.33]     | 0.04                                | [0.03]     | -0.02 | [0.02]     |
| 45-54                                           | 0.22                    | [0.15]     | 1.54                              | [2.19]     | -0.21                      | [0.17]     | 12.66                               | [20.22]     | 0.07                          | [0.16]     | -0.36                                  | [0.27]     | -0.02                               | [0.02]     | -0.02 | [0.02]     |
| 55-64                                           | 0.60                    | *** [0.17] | -2.02                             | [2.15]     | -0.09                      | [0.16]     | -18.00                              | [20.58]     | -0.23                         | [0.15]     | -1.23                                  | *** [0.37] | -0.07                               | ** [0.02]  | 0.00  | [0.02]     |
| 65-74                                           | 1.01                    | *** [0.22] | -4.71                             | [3.04]     | 0.50                       | * [0.23]   | -2.15                               | [24.29]     | -0.65                         | ** [0.21]  | N/A                                    |            | -0.12                               | *** [0.02] | -0.01 | [0.02]     |
| 75+                                             | 1.25                    | *** [0.24] | -9.43                             | *** [3.1]  | 0.28                       | [0.24]     | -89.31                              | *** [25.6]  | -0.88                         | *** [0.22] | -0.64                                  | [0.56]     | -0.07                               | * [0.03]   | -0.02 | [0.02]     |
| Married                                         | 0.30                    | ** [0.12]  | -2.39                             | [1.35]     | -0.07                      | [0.11]     | -12.88                              | [11.56]     | -0.14                         | [0.11]     | 0.32                                   | [0.26]     | -0.03                               | [0.02]     | -0.01 | [0.01]     |
| <i>Individual's Total # of Episodes</i>         |                         |            |                                   |            |                            |            |                                     |             |                               |            |                                        |            |                                     |            |       |            |
| 2 Episodes                                      | 0.65                    | *** [0.11] | -18.04                            | *** [2.13] | 0.15                       | [0.13]     | -271.40                             | *** [16.65] | -1.05                         | *** [0.12] | -0.56                                  | * [0.24]   | -0.04                               | * [0.02]   | -0.04 | ** [0.01]  |
| > 2 Episodes                                    | 1.32                    | *** [0.13] | -24.47                            | *** [1.87] | 1.16                       | *** [0.13] | -389.24                             | *** [17.23] | -2.03                         | *** [0.14] | -1.01                                  | *** [0.28] | -0.10                               | *** [0.02] | -0.05 | *** [0.01] |
| Panel                                           | -0.04                   | [0.04]     | 0.61                              | [0.54]     | -0.01                      | [0.03]     | 6.17                                | [4.24]      | 0.01                          | [0.04]     | -0.08                                  | [0.07]     | 0.00                                | [0.00]     | -0.01 | [0.00]     |
| <b>Non-Need-Related Variables - SES</b>         |                         |            |                                   |            |                            |            |                                     |             |                               |            |                                        |            |                                     |            |       |            |
| <i>% Federal Poverty Level</i>                  |                         |            |                                   |            |                            |            |                                     |             |                               |            |                                        |            |                                     |            |       |            |
| 100-124%                                        | 0.31                    | [0.20]     | 1.06                              | [2.64]     | -0.44                      | * [0.19]   | -11.12                              | [29]        | 0.25                          | [0.19]     | 0.09                                   | [0.36]     | -0.03                               | [0.02]     | -0.02 | [0.02]     |
| 125-199%                                        | 0.06                    | [0.16]     | 0.47                              | [2.61]     | -0.18                      | [0.15]     | -11.11                              | [17.4]      | 0.14                          | [0.14]     | 0.28                                   | [0.27]     | -0.02                               | [0.02]     | 0.01  | [0.02]     |
| 200-399%                                        | 0.12                    | [0.15]     | 1.41                              | [2.18]     | -0.31                      | * [0.16]   | -0.05                               | [18.16]     | 0.19                          | [0.15]     | -0.52                                  | [0.34]     | -0.01                               | [0.02]     | 0.00  | [0.02]     |
| 400%+                                           | -0.27                   | [0.18]     | 5.16                              | [2.64]     | -0.33                      | [0.19]     | 43.06                               | * [20.17]   | 0.51                          | ** [0.17]  | -0.37                                  | [0.46]     | 0.06                                | * [0.03]   | -0.01 | [0.02]     |
| <i>Education</i>                                |                         |            |                                   |            |                            |            |                                     |             |                               |            |                                        |            |                                     |            |       |            |
| HS grad                                         | 0.01                    | [0.13]     | 1.62                              | [1.58]     | -0.03                      | [0.13]     | 22.31                               | [13.7]      | 0.17                          | [0.12]     | 0.43                                   | [0.24]     | 0.00                                | [0.02]     | 0.01  | [0.01]     |
| Any college                                     | -0.08                   | [0.16]     | 0.41                              | [2.07]     | 0.04                       | [0.16]     | -8.68                               | [17.78]     | 0.05                          | [0.15]     | -0.03                                  | [0.31]     | 0.01                                | [0.02]     | 0.02  | [0.02]     |
| College grad                                    | -0.54                   | ** [0.19]  | 9.85                              | *** [2.66] | -0.32                      | [0.21]     | 28.46                               | [19.85]     | 0.62                          | *** [0.17] | 0.01                                   | [0.43]     | 0.11                                | *** [0.03] | 0.01  | [0.02]     |
| <b>Other Non-Need Related Variables</b>         |                         |            |                                   |            |                            |            |                                     |             |                               |            |                                        |            |                                     |            |       |            |
| <i>Insurance</i>                                |                         |            |                                   |            |                            |            |                                     |             |                               |            |                                        |            |                                     |            |       |            |
| Any uninsured                                   | 0.23                    | [0.17]     | 0.11                              | [2.13]     | 0.27                       | [0.17]     | -34.84                              | [21.97]     | -0.39                         | * [0.17]   | 0.30                                   | [0.37]     | 0.00                                | [0.02]     | 0.02  | [0.02]     |
| Any public, never uninsured                     | -0.17                   | [0.14]     | 4.22                              | * [1.92]   | -0.16                      | [0.18]     | 29.65                               | [16.34]     | 0.26                          | [0.15]     | 0.62                                   | [0.32]     | 0.00                                | [0.02]     | 0.04  | ** [0.01]  |
| HMO                                             | 0.00                    | [0.11]     | 0.31                              | [1.62]     | 0.09                       | [0.11]     | -2.84                               | [12.95]     | -0.05                         | [0.10]     | 0.12                                   | [0.23]     | -0.01                               | [0.01]     | 0.01  | [0.01]     |
| Employed                                        | 0.29                    | * [0.14]   | -4.04                             | ** [1.68]  | 0.40                       | * [0.16]   | -14.14                              | [16.19]     | -0.29                         | * [0.14]   | 0.26                                   | [0.29]     | -0.05                               | * [0.02]   | 0.02  | [0.01]     |
| <i>Region</i>                                   |                         |            |                                   |            |                            |            |                                     |             |                               |            |                                        |            |                                     |            |       |            |
| Midwest                                         | 0.30                    | [0.17]     | -2.27                             | [2.21]     | -0.01                      | [0.16]     | 29.69                               | [19.14]     | -0.07                         | [0.17]     | 0.16                                   | [0.32]     | -0.07                               | *** [0.02] | 0.00  | [0.01]     |
| South                                           | 0.26                    | [0.14]     | -5.83                             | *** [1.92] | 0.23                       | [0.16]     | -9.85                               | [16.84]     | -0.29                         | [0.16]     | -0.14                                  | [0.30]     | -0.07                               | *** [0.02] | 0.01  | [0.01]     |
| West                                            | 0.23                    | [0.16]     | -1.35                             | [2.38]     | 0.19                       | [0.18]     | -6.89                               | [18.66]     | -0.33                         | * [0.17]   | -0.33                                  | [0.37]     | -0.07                               | ** [0.02]  | 0.04  | * [0.02]   |

|                 |       |        |       |        |       |        |            |         |          |        |       |        |         |        |         |        |
|-----------------|-------|--------|-------|--------|-------|--------|------------|---------|----------|--------|-------|--------|---------|--------|---------|--------|
| Urbanicity      | -0.09 | [0.13] | 2.74  | [1.59] | -0.17 | [0.13] | 2.52       | [15.5]  | 0.09     | [0.13] | -0.25 | [0.26] | 0.04 ** | [0.01] | -0.03 * | [0.01] |
| <b>Constant</b> | -0.15 | [0.81] | -2.49 | [13.9] | -0.60 | [0.72] | 309.61 *** | [88.19] | 6.63 *** | [0.71] | -2.95 | [1.73] | 0.19 *  | [0.09] | 0.26 ** | [0.09] |

Data: Panels 9-13 (2004-2009) Medical Expenditure Panel Survey, \*\*\* p<0.001, \*\* p<0.01, \* p<0.05

## Sensitivity Analysis: Episode Initiation

|                                         | Episode = 0<br>treated as<br>Initiation = 0 |               | Episode = 0<br>treated as<br>Initiation = 1 |               | Episode = 0<br>treated as<br>Initiation = . |               |
|-----------------------------------------|---------------------------------------------|---------------|---------------------------------------------|---------------|---------------------------------------------|---------------|
|                                         | Coef.                                       | SE            | Coef.                                       | SE            | Coef.                                       | SE            |
| <b>Race/Ethnicity</b>                   |                                             |               |                                             |               |                                             |               |
| Black                                   | -0.72 ***                                   | [0.10]        | -1 ***                                      | [0.10]        | -0.93 ***                                   | [0.11]        |
| Latino                                  | -0.46 ***                                   | [0.10]        | -0.57 ***                                   | [0.11]        | -0.56 ***                                   | [0.11]        |
| <b>Mental Health Status Variables</b>   |                                             |               |                                             |               |                                             |               |
| Severe psychological distress (K-6)     | -0.01                                       | [0.04]        | 0                                           | [0.04]        | 0.01                                        | [0.04]        |
| Probable depressive disorder (PHQ-2)    | 0.01                                        | [0.01]        | 0.03 **                                     | [0.01]        | 0.02                                        | [0.01]        |
| Mental health component SF-12           | -0.02 **                                    | [0.01]        | -0.02 **                                    | [0.01]        | -0.02 ***                                   | [0.01]        |
| <i>Self rated mental health</i>         |                                             |               |                                             |               |                                             |               |
| Very Good                               | 0.26                                        | [0.17]        | 0.37 *                                      | [0.18]        | 0.32                                        | [0.17]        |
| Good                                    | 0.34 *                                      | [0.15]        | 0.58 ***                                    | [0.16]        | 0.45 **                                     | [0.16]        |
| Fair                                    | 0.79 ***                                    | [0.16]        | 1.16 ***                                    | [0.16]        | 1.05 **                                     | [0.16]        |
| Poor                                    | 0.71 ***                                    | [0.20]        | 1.47 ***                                    | [0.21]        | 1.26 **                                     | [0.22]        |
| <b>Other Health Status Variables</b>    |                                             |               |                                             |               |                                             |               |
| 1 physical health comorbidity           | 0.03                                        | [0.12]        | 0.07                                        | [0.11]        | 0.07                                        | [0.13]        |
| 2+ physical health comorbidities        | 0.37 **                                     | [0.12]        | 0.42 ***                                    | [0.12]        | 0.47 ***                                    | [0.13]        |
| Physical health component SF-12         | 0                                           | [0.00]        | 0                                           | [0.00]        | 0                                           | [0.00]        |
| Any work limitation                     | 0.04                                        | [0.10]        | 0.4 ***                                     | [0.11]        | 0.27 *                                      | [0.12]        |
| <b>Other Covariates</b>                 |                                             |               |                                             |               |                                             |               |
| Female                                  | 0.4 ***                                     | [0.08]        | 0.49 ***                                    | [0.09]        | 0.53 ***                                    | [0.09]        |
| <i>Age</i>                              |                                             |               |                                             |               |                                             |               |
| 18-24                                   | -0.2                                        | [0.17]        | -0.31                                       | [0.17]        | -0.31                                       | [0.18]        |
| 25-34                                   | -0.01                                       | [0.14]        | 0                                           | [0.14]        | -0.01                                       | [0.15]        |
| 45-54                                   | 0.08                                        | [0.12]        | 0.09                                        | [0.12]        | 0.07                                        | [0.13]        |
| 55-64                                   | -0.02                                       | [0.14]        | -0.2                                        | [0.14]        | -0.17                                       | [0.15]        |
| 65-74                                   | -0.26                                       | [0.18]        | -0.75 ***                                   | [0.18]        | -0.64 **                                    | [0.20]        |
| 75+                                     | -0.33                                       | [0.18]        | -0.92 ***                                   | [0.19]        | -0.78 ***                                   | [0.19]        |
| Married                                 | -0.04                                       | [0.08]        | -0.13                                       | [0.09]        | -0.08                                       | [0.09]        |
| <i>% Federal Poverty Level</i>          |                                             |               |                                             |               |                                             |               |
| 100-124%                                | 0.04                                        | [0.16]        | 0.05                                        | [0.16]        | 0.07                                        | [0.17]        |
| 125-199%                                | 0.02                                        | [0.12]        | -0.04                                       | [0.13]        | 0                                           | [0.14]        |
| 200-399%                                | 0.07                                        | [0.12]        | 0.11                                        | [0.12]        | 0.13                                        | [0.12]        |
| 400%+                                   | 0.3 *                                       | [0.13]        | 0.28 *                                      | [0.14]        | 0.36 *                                      | [0.15]        |
| <i>Education</i>                        |                                             |               |                                             |               |                                             |               |
| HS grad                                 | 0.16                                        | [0.10]        | 0.28 **                                     | [0.10]        | 0.24 *                                      | [0.10]        |
| Any college                             | 0.32 **                                     | [0.11]        | 0.45 ***                                    | [0.12]        | 0.44 ***                                    | [0.12]        |
| College grad                            | 0.1                                         | [0.13]        | 0.46 **                                     | [0.15]        | 0.32 *                                      | [0.16]        |
| <i>Insurance</i>                        |                                             |               |                                             |               |                                             |               |
| Any uninsured                           | -0.34 **                                    | [0.12]        | -0.67 ***                                   | [0.12]        | -0.55 **                                    | [0.13]        |
| Any public, never uninsured             | -0.06                                       | [0.12]        | 0                                           | [0.12]        | -0.02                                       | [0.13]        |
| HMO                                     | 0.04                                        | [0.09]        | 0.01                                        | [0.09]        | 0                                           | [0.10]        |
| Employed                                | -0.22 *                                     | [0.10]        | -0.46 ***                                   | [0.10]        | -0.41 **                                    | [0.11]        |
| <i>Region</i>                           |                                             |               |                                             |               |                                             |               |
| Midwest                                 | -0.02                                       | [0.11]        | -0.11                                       | [0.13]        | -0.04                                       | [0.13]        |
| South                                   | -0.04                                       | [0.11]        | -0.11                                       | [0.11]        | -0.07                                       | [0.12]        |
| West                                    | -0.04                                       | [0.11]        | -0.26 *                                     | [0.12]        | -0.13                                       | [0.12]        |
| Urbanicity                              | -0.03                                       | [0.10]        | 0.03                                        | [0.10]        | 0                                           | [0.11]        |
| <i>Individual's Total # of Episodes</i> |                                             |               |                                             |               |                                             |               |
| 2 Episodes                              |                                             |               |                                             |               |                                             |               |
| > 2 Episodes                            |                                             |               |                                             |               |                                             |               |
| Panel                                   | 0.03                                        | [0.03]        | 0.05                                        | [0.03]        | 0.04                                        | [0.03]        |
| <b>Constant</b>                         | <b>-0.98</b>                                | <b>[0.54]</b> | <b>-1.22 *</b>                              | <b>[0.58]</b> | <b>-1.26 *</b>                              | <b>[0.60]</b> |

Data: Panels 9-13 (2004-2009) Medical Expenditure Panel Survey, \*\*\* p&lt;0.001, \*\* p&lt;0.01, \* p&lt;0.05
